# Supplementary material for: Pan-genome analysis identifies intersecting roles for Pseudomonas specialized metabolites in potato pathogen inhibition
Source: eLife. 2021 Nov 18;10:e71900. doi: 10.7554/eLife.71900 (PMC8719888; doi:10.7554/eLife.71900)
Supplement: Figure 1—source data 1. [file elife-71900-fig1-data1.csv]

Order	Header	A1a	A1b	A1c	A2a	A2b	A2c	B1a	B1b	B1c	B2a	B2b	B2c
Order	Chthoniobacterales	288	0	1109	2734	2541	1436	1192	351	244	4543	2455	4214
Order	Methylophilales	52	115	603	10631	9231	5580	454	516	55	2488	2666	2865
Order	Holophagales	1	240	688	120	1807	568	212	966	1336	401	1257	219
Order	Flavobacteriales	3600	8525	19924	44313	23453	24490	4490	9098	6928	18047	16885	10622
Order	Erysipelotrichales	8	17	13	15	9	12	9	1016	10	19	38	3
Order	Halanaerobiales	31	65	88	45	28	20	129	48	53	48	27	67
Order	Sphingomonadales	2466	18915	7517	44474	31998	28178	7769	7391	8627	32730	32824	33058
Order	Gemmatimonadales	140	14	337	1504	1442	723	341	263	2	3260	2978	3519
Order	Bdellovibrionales	57	19	152	1376	2376	3664	870	1028	18	3261	2682	2366
Order	Clostridiales	6899	22984	22540	36589	33538	22057	34293	22357	22276	48519	42905	43732
Order	Thiotrichales	1227	2963	2643	3345	2428	2247	3480	4065	3479	2148	3017	3132
Order	Gallionellales	194	44	48	160	97	186	111	88	44	178	131	297
Order	Turicibacterales	5	5	6	2	0	0	25	1	2	3	1	2
Order	Methanosarcinales	0	0	0	0	0	0	0	0	0	0	0	3
Order	Thermicanales	66	142	92	106	106	976	117	230	74	111	114	209
Order	Desulfobacterales	0	1	0	2	0	16	3	12	11	16	7	2
Order	Lactobacillales	25412	56863	56943	30307	33482	18888	54713	77780	38765	41591	31530	21392
Order	Burkholderiales	199983	90926	56052	86725	88985	61415	45000	76199	79550	57462	54562	50807
Order	Acidimicrobiales	203	731	120	2726	2778	3072	1032	2163	170	8474	5876	4511
Order	Acidithiobacillales	1	0	0	18	0	6	1	0	1	16	1	10
Order	Acidobacteriales	157	2148	1488	4438	1408	1624	625	1338	289	3508	3776	2554
Order	Pirellulales	78	0	658	1568	1132	541	207	3	384	1683	568	525
Order	Methylacidiphilales	106	55	147	2268	760	793	875	167	59	3049	1399	1221
Order	Nostocales	542	3486	2980	2433	2496	1382	1179	1393	1747	2454	2350	1264
Order	Rhodocyclales	1357	3844	2299	8357	5269	4262	2646	3269	2073	13058	13468	10812
Order	Campylobacterales	1108	3193	614	4032	2378	1608	2425	942	1543	1692	1292	1963
Order	Xanthomonadales	255529	7309	24691	20630	24586	13287	7027	10226	10330	27045	23253	21256
Order	Cenarchaeales	0	0	0	167	41	35	0	29	31	18	0	230
Order	Stigonematales	5543	22081	19609	19588	22663	13947	11160	13178	20794	14551	12442	10609
Order	Verrucomicrobiales	146	11	2342	4052	2896	3296	438	21	330	2129	3612	2651
Order	Rickettsiales	1538	10350	4422	3465	4706	1038	2573	8066	2898	1588	3756	1756
Order	Syntrophobacterales	221	674	1104	5031	4930	2054	982	399	519	7173	4975	6231
Order	Myxococcales	1055	3019	3949	26202	24730	12345	2114	5742	3910	38500	28609	33381
Order	Thermales	28	26	69	64	53	860	90	61	38	325	570	929
Order	Oscillatoriales	167	534	789	475	772	878	363	446	896	436	293	305
Order	Sphingobacteriales	2943	14672	13103	36129	17715	12381	6904	8021	16146	23532	26994	19957
Order	Neisseriales	3269	246	2376	9022	4093	370	3063	2609	195	3952	3278	1606
Order	Thermotogales	236	3023	1158	483	370	552	229	261	510	1833	3756	2117
Order	Nitrososphaerales	4	0	0	0	8	362	176	0	0	73	276	6
Order	Nitrospirales	271	1453	187	4096	3263	3560	1317	258	1493	10577	7130	6885
Order	Anaerolineales	922	6785	3182	2924	1574	1160	3965	13195	5673	4084	3364	3448
Order	Bacillales	58359	81921	156090	37743	47781	27510	529324	48584	32839	60384	40932	52442
Order	Thermoproteales	0	0	6	1	1	6	6	0	0	0	1	1
Order	Deferribacterales	36	150	36	355	383	126	80	64	71	162	369	389
Order	Desulfurococcales	1	1	1	10	1	6	2	0	0	2	1	3
Order	Methanomicrobiales	1	1	2	4	5	88	57	4	14	19	76	188
Order	Roseiflexales	1	3	2	1528	734	1081	2	1	1	2188	3830	3604
Order	Aeromonadales	462	1610	1044	1740	1313	965	1163	1372	2237	1421	728	709
Order	Entomoplasmatales	8	15	19	17	28	15	27	20	12	16	9	13
Order	Chloroflexales	0	0	0	9	0	170	0	0	1	17	99	10
Order	Anaeroplasmatales	0	0	0	0	1	0	0	0	0	0	0	2
Order	Pelagicoccales	91	268	975	1228	870	700	219	745	337	2193	1957	1760
Order	Alteromonadales	45979	227827	136795	233301	200554	127119	151462	213339	209793	141585	138987	130380
Order	Rhizobiales	66782	43359	31963	105363	79243	63236	16957	28131	29491	100119	90237	102315
Order	Chthonomonadales	0	0	0	0	0	0	0	0	0	0	176	1
Order	Acholeplasmatales	245	159	785	1342	1093	516	107	90	114	1083	1571	81
Order	Natranaerobiales	314	176	88	135	224	383	63	183	93	219	239	374
Order	Rhodobacterales	44249	22465	16934	20561	27558	9488	14387	12663	11134	24315	12757	7905
Order	Synergistales	37	123	113	829	827	202	77	96	255	1709	1562	1446
Order	Desulfuromonadales	370	3728	1482	1685	2469	572	1763	664	1323	3149	4408	4706
Order	Bacteroidales	1281	11300	1678	1103	1294	1896	3524	970	427	6663	259	424
Order	Brocadiales	105	3941	1819	5011	4869	4255	1299	2338	4299	8065	7634	7652
Order	Pedosphaerales	73	351	78	4288	2731	2493	1272	1154	0	4711	3519	2352
Order	Sulfolobales	0	0	3	1	0	0	0	1	1	0	1	1
Order	Thermodesulfobacteriales	295	94	91	82	78	31	218	71	338	66	80	70
Order	Actinomycetales	42794	192565	193427	221792	190770	146042	205162	140579	143475	270059	216766	218503
Order	Chromatiales	3256	17173	6751	14923	18050	9132	8327	11278	8457	25648	23123	21557
Order	Gemellales	272	1384	342	1306	5728	1493	479	2332	33	2585	23	3161
Order	Chrysiogenales	3	7	8	14	4	7	176	5	6	12	10	6
Order	Planctomycetales	1489	1885	648	2922	4434	3598	564	3013	1921	2903	5453	5163
Order	Chlorobiales	282	1271	1760	712	96	686	1076	700	1602	1285	102	508
Order	Thermobaculales	8	126	11	1595	792	12	45	127	13	60	389	810
Order	Solibacterales	0	1334	304	605	143	1018	45	2	249	285	1019	361
Order	Puniceicoccales	4	1395	429	58	38	17	543	1232	437	119	624	81
Order	Caldilineales	248	1165	1757	916	100	275	73	85	247	1180	1241	855
Order	Oceanospirillales	131925	705197	379864	588020	502637	320697	431041	614270	561709	392323	356415	304196
Order	Dehalococcoidales	0	0	2	17	12	1	1	90	19	46	11	41
Order	Thiohalorhabdales	124	78	44	96	57	194	34	67	49	66	78	81
Order	Chroococcales	209	382	758	564	382	362	1439	3861	674	2021	344	346
Order	Unclassified	61520	121189	228084	146604	129534	99692	202135	104164	110862	197473	171758	149724
Order	Thermogemmatisporales	273	631	1135	4865	3033	1528	700	3601	755	2405	2372	3064
Order	Hydrogenophilales	47	52	60	711	272	142	58	30	34	459	1001	366
Order	Solirubrobacterales	353	1138	1837	3338	6608	4047	1894	6116	2611	11352	14102	8650
Order	Legionellales	7623	33561	24674	7446	4252	4675	23219	33439	32281	9290	9243	7765
Order	Leptospirales	7	34	21	67	124	473	50	61	52	1296	40	546
Order	Vibrionales	314	481	1149	363	263	214	592	398	423	514	206	186
Order	(Microviridae)	6	11	7	3	6	2	9	6	5	8	10	5
Order	Enterobacteriales	20459	113289	91601	120505	72978	58075	73795	112696	105704	79292	73116	61903
Order	Methylococcales	2	841	4	2075	6	306	7	7	9	1863	605	319
Order	Caldisericales	0	1	0	0	0	0	1	0	0	6	2	1
Order	Armatimonadales	1	0	0	274	0	0	0	0	0	0	282	0
Order	Caulobacterales	458518	5268	7664	7671	10176	4834	2592	5280	3670	6826	5490	5420
Order	Thermoanaerobacterales	8007	7709	3499	9544	9104	7201	2785	6808	4408	14109	16801	14610
Order	Fimbriimonadales	0	0	569	28	871	647	0	0	605	0	0	602
Order	Pasteurellales	3342	10080	8666	6123	7758	3161	6843	14251	9311	5062	13002	7879
Order	Thiobacterales	0	2	0	6	7	1	1	7	0	4	1	11
Order	Caldithrixales	6	1484	616	2687	93	987	293	29	85	1801	1089	1056
Order	Gemmatales	569	123	12	2774	3016	3138	1796	114	1238	3023	4875	4485
Order	Borreliales	9	39	31	17	5	12	61	6	53	541	973	591
Order	Chlamydiales	1244	5158	5659	2616	3833	2361	11647	13822	13530	3020	731	1714
Order	Cerasicoccales	1	148	11	126	227	95	28	202	31	278	641	95
Order	Bifidobacteriales	399	1911	2035	2267	2449	722	579	848	1271	5770	4650	2817
Order	Opitutales	53	0	2	3143	4381	877	149	3528	1222	1824	1683	1546
Order	Exiguobacterales	12	14	364	19	8234	569	33	18	3	1934	510	914
Order	Mycoplasmatales	450	2722	1298	933	1181	303	2073	1703	2982	1496	979	868
Order	Fibrobacterales	1	0	1	0	0	2	1	0	0	1	3	2
Order	Fusobacteriales	71	24	2232	28	1309	2274	301	15	10	121	31	1200
Order	Rubrobacterales	0	0	43	19	0	47	0	239	101	140	211	97
Order	Deinococcales	414	1479	638	751	257	1276	487	2189	543	2337	6775	1151
Order	Rhodospirillales	5810	15033	7524	33958	22518	14471	11876	12397	7880	37982	27425	28539
Order	Synechococcales	0	0	0	0	0	151	1	551	0	0	0	0
Order	Brachyspirales	0	2	428	1142	0	55	2	2	0	371	466	8
Order	Coriobacteriales	281	622	1861	1079	676	1626	389	336	851	1206	924	1753
Order	Nitrosomonadales	0	1	0	0	0	146	0	0	0	780	0	0
Order	Spirochaetales	464	608	58	350	76	190	46	56	21	382	631	1117
Order	Halobacteriales	0	0	0	0	0	1	0	0	0	1	0	3
Order	Kiloniellales	326	924	675	1076	1311	1116	628	640	536	990	2525	1642
Order	Euzebyales	208	1527	528	1350	1284	948	1198	2062	532	2566	2565	2282
Order	Pseudanabaenales	233	13	848	1280	1586	1457	64	16	1273	1129	1304	129
Order	Archaeoglobales	0	1	0	0	0	0	0	0	0	0	0	0
Order	Desulfovibrionales	429	3594	1733	6560	6539	5056	2906	5825	4197	13575	10527	9488
Order	Pseudomonadales	65142	120095	105741	105673	109991	61692	128325	91725	60321	82176	66931	55787
