# Supplementary material for: Pan-genome analysis identifies intersecting roles for Pseudomonas specialized metabolites in potato pathogen inhibition
Source: eLife. 2021 Nov 18;10:e71900. doi: 10.7554/eLife.71900 (PMC8719888; doi:10.7554/eLife.71900)
Supplement: Supplementary file 1. [file elife-71900-supp1.xlsx]

## Sheet: Contents
Supplementary File 1 Overview
Sheet	Contents
Phenotypes	Phenotypic data for all strains isolated in first two sampling periods
BGCs and accessory genome	BGCs and accessory genome loci for each sequenced strain
Later samples	Phenotypic data for all strains isolated in the final sampling period

## Sheet: Phenotypes
Strains and sampling				Phenotypes
Strain	Sequenced	Sampling (1st or 2nd)	Irrigation (i= irrigated plot; n = not irrigated)	Siderophore intensity	Protease activity assay	Motility	Congo red	Take all inhibition	Suppression of S. scabies	HCN production
Ps616	0	1st	N/A	0	0	0	0	0	0	0
Ps617	0	1st	N/A	0	0	0	0	2	0	0
Ps618	0	1st	N/A	0	0	0	0	2	0	0
Ps619	1	1st	N/A	1	0	2	1	3	3	3
Ps620	0	1st	N/A	1	0	2	0	2	1	0
Ps621	0	1st	N/A	/	2	/	1	/	/	0
Ps622	0	1st	N/A	2	0	/	0	/	/	0
Ps623	1	1st	N/A	2	0	1	0	2	0	0
Ps624	1	1st	N/A	0	0	2	2	2	3	3
Ps625	0	1st	N/A	0	0	0	1	2	2	0
Ps626	0	1st	N/A	0	0	0	0	2	0	0
Ps627	1	1st	N/A	0	0	0	1	2	0	0
Ps628	0	1st	N/A	0	0	0	0	1	0	0
Ps629	0	1st	N/A	0	0	0	0	2	0	0
Ps630	0	1st	N/A	0	0	0	0	1	0	0
Ps631	1	1st	N/A	2	0	1	2	1	1	0
Ps632	0	1st	N/A	2	0	/	0	1	1	0
Ps633	0	1st	N/A	0	0	2	1	2	2	0
Ps634	1	1st	N/A	0	0	1	0	2	2	0
Ps635	0	1st	N/A	0	0	0	0	2	0	0
Ps636	0	1st	N/A	0	0	0	1	1	1	0
Ps637	0	1st	N/A	0	0	0	1	2	0	0
Ps638	0	1st	N/A	1	0	0	2	1	0	0
Ps639	1	1st	N/A	0	0	0	/	0	0	0
Ps640	0	1st	N/A	1	0	0	0	2	0	0
Ps641	0	1st	N/A	0	0	0	1	2	0	0
Ps642	0	1st	N/A	0	0	0	0	2	0	0
Ps643	0	1st	N/A	0	0	0	0	2	0	0
Ps644	0	1st	N/A	0	0	0	0	0	0	0
Ps645	1	1st	N/A	1	0	0	1	0	0	0
Ps646	0	1st	N/A	1	0	0	0	2	0	0
Ps647	1	1st	N/A	1	0	0	1	1	0	0
Ps648	0	1st	N/A	0	0	0	0	1	0	0
Ps649	0	1st	N/A	0	0	0	0	1	0	0
Ps650	0	1st	N/A	0	0	0	1	0	0	0
Ps651	0	1st	N/A	2	0	/	1	/	/	0
Ps652	1	1st	N/A	2	2	0	0	1	3	2
Ps653	0	1st	N/A	0	0	0	0	0	0	0
Ps654	0	1st	N/A	0	0	0	0	1	0	0
Ps655	1	1st	N/A	3	0	0	1	2	1	3
Ps656	0	1st	N/A	0	0	0	0	2	0	2
Ps657	0	1st	N/A	1	0	0	0	0	0	0
Ps658	0	1st	N/A	0	0	0	0	1	0	0
Ps659	1	1st	N/A	0	0	0	0	1	0	0
Ps660	0	1st	N/A	1	2	0	0	1	1	0
Ps661	0	1st	N/A	0	0	0	0	0	0	0
Ps662	1	1st	N/A	0	0	0	1	0	2	0
Ps663	1	1st	N/A	2	2	2	1	2	1	0
Ps664	1	1st	N/A	0	0	2	2	2	0	0
Ps665	0	1st	N/A	1	0	0	2	1	0	0
Ps666	0	1st	N/A	0	0	0	0	1	0	0
Ps667	0	1st	N/A	1	0	0	0	0	0	0
Ps668	0	1st	N/A	1	0	0	1	1	0	0
Ps669	0	1st	N/A	1	0	0	0	0	0	0
Ps670	0	1st	N/A	1	0	0	/	0	0	0
Ps671	0	1st	N/A	0	0	0	0	1	0	0
Ps672	0	1st	N/A	0	0	0	0	0	0	0
Ps673	1	1st	N/A	1	0	0	0	0	0	0
Ps674	0	1st	N/A	0	0	0	1	1	0	0
Ps675	0	1st	N/A	0	0	0	0	0	0	0
Ps676	1	1st	N/A	0	0	/	1	/	0	0
Ps677	0	1st	N/A	2	0	1	0	1	1	2
Ps678	0	1st	N/A	0	0	0	0	1	0	0
Ps679	0	1st	N/A	1	2	1	2	2	1	0
Ps680	0	1st	N/A	0	0	0	1	0	0	0
Ps681	1	1st	N/A	2	0	0	0	2	1	3
Ps682	1	1st	N/A	3	2	1	1	1	2	0
Ps683	1	1st	N/A	3	2	1	1	1	2	0
Ps684	1	1st	N/A	3	0	0	1	1	1	3
Ps685	1	1st	N/A	0	0	0	0	1	0	0
Ps686	0	1st	N/A	0	0	2	1	0	0	0
Ps687	1	1st	N/A	2	2	2	2	2	3	0
Ps688	0	1st	N/A	0	0	0	1	1	0	0
Ps689	1	1st	N/A	0	0	0	1	2	2	0
Ps690	0	1st	N/A	3	0	0	0	2	2	0
Ps691	1	1st	N/A	0	0	0	/	0	0	0
Ps692	0	1st	N/A	0	0	0	1	2	1	0
Ps693	0	1st	N/A	0	0	0	/	1	0	/
Ps694	0	1st	N/A	2	2	0	1	/	0	0
Ps695	0	1st	N/A	1	0	0	1	2	0	0
Ps696	0	1st	N/A	0	0	0	0	1	0	0
Ps697	0	1st	N/A	0	0	0	1	0	0	0
Ps698	0	1st	N/A	2	2	0	0	2	0	2
Ps699	0	1st	N/A	0	0	0	0	2	0	/
Ps700	0	1st	N/A	2	0	0	1	1	0	0
Ps701	0	1st	N/A	3	2	0	1	2	1	1
Ps702	0	1st	N/A	0	0	0	0	0	0	0
Ps703	0	1st	N/A	3	2	0	1	0	2	0
Ps704	1	1st	N/A	0	0	0	1	0	2	0
Ps705	0	1st	N/A	3	2	0	0	0	0	0
Ps706	1	1st	N/A	3	2	0	1	3	1	0
Ps707	0	1st	N/A	0	0	0	0	2	0	0
Ps708	1	1st	N/A	3	2	0	2	1	2	0
Ps709	0	1st	N/A	3	0	0	2	1	0	0
Ps710	1	1st	N/A	0	0	0	0	0	0	0
Ps711	0	1st	N/A	0	0	0	1	2	0	0
Ps712	1	1st	N/A	2	0	0	0	1	0	0
Ps713	0	1st	N/A	3	0	0	0	1	0	0
Ps714	0	1st	N/A	0	0	0	0	0	0	0
Ps715	0	1st	N/A	0	0	0	/	2	0	0
Ps716	0	1st	N/A	0	0	0	0	2	0	0
Ps717	0	1st	N/A	1	0	0	0	2	0	2
Ps718	1	1st	N/A	2	0	0	1	2	1	3
Ps719	0	1st	N/A	0	0	0	0	1	0	0
Ps720	1	1st	N/A	3	2	0	0	2	2	0
Ps721	0	1st	N/A	0	0	0	0	2	0	0
Ps722	0	1st	N/A	0	0	0	1	2	1	0
Ps723	1	1st	N/A	0	0	0	0	0	0	0
Ps724	0	1st	N/A	0	0	0	1	0	0	0
Ps725	0	1st	N/A	0	0	0	0	1	0	0
Ps726	1	1st	N/A	0	0	0	0	0	2	0
Ps727	0	1st	N/A	1	0	0	0	0	0	0
Ps728	0	1st	N/A	0	0	0	0	0	0	0
Ps729	0	1st	N/A	1	0	0	1	1	0	0
Ps730	0	1st	N/A	0	0	0	0	2	0	0
Ps731	0	1st	N/A	2	0	0	1	1	0	2
Ps732	1	1st	N/A	1	2	0	0	0	3	3
Ps733	0	1st	N/A	2	2	1	2	2	1	0
Ps734	0	1st	N/A	2	2	1	2	2	0	0
Ps831	0	2nd	i	0	0	0	1	0	0	0
Ps832	0	2nd	i	1	0	0	0	1	0	0
Ps833	1	2nd	i	1	0	0	1	1	0	0
Ps834	1	2nd	i	3	2	0	2	2	1	0
Ps835	0	2nd	i	2	0	0	1	2	0	0
Ps836	0	2nd	i	0	0	0	0	1	0	0
Ps837	0	2nd	i	0	0	0	0	0	0	0
Ps838	1	2nd	i	1	0	0	1	2	0	0
Ps839	0	2nd	i	1	0	0	0	0	0	0
Ps840	0	2nd	i	2	0	0	0	1	0	0
Ps841	0	2nd	i	0	0	0	0	1	0	0
Ps842	0	2nd	i	2	0	0	0	0	0	0
Ps843	1	2nd	i	2	0	0	0	1	0	0
Ps844	0	2nd	i	0	0	0	1	0	0	0
Ps845	0	2nd	i	0	0	0	2	1	0	0
Ps846	0	2nd	i	0	0	0	0	0	0	0
Ps847	1	2nd	i	2	2	1	2	0	1	1
Ps848	0	2nd	i	0	0	0	1	1	0	0
Ps849	0	2nd	i	2	0	0	2	2	0	0
Ps850	1	2nd	i	1	0	0	0	0	0	0
Ps851	0	2nd	i	0	0	0	0	1	0	0
Ps852	0	2nd	i	0	0	0	0	0	0	0
Ps853	0	2nd	i	1	0	1	2	1	0	0
Ps854	1	2nd	i	3	0	0	1	2	0	0
Ps855	0	2nd	i	0	0	0	0	0	0	0
Ps856	0	2nd	i	2	0	0	0	1	0	0
Ps857	0	2nd	i	1	0	0	1	0	0	0
Ps858	1	2nd	i	2	0	0	1	1	0	0
Ps859	0	2nd	i	0	0	0	0	0	0	0
Ps860	0	2nd	i	1	0	0	1	0	0	0
Ps861	1	2nd	i	1	0	2	0	0	1	3
Ps862	1	2nd	i	0	0	0	1	0	0	0
Ps863	0	2nd	i	0	0	0	0	2	0	0
Ps864	0	2nd	i	0	0	0	2	2	0	0
Ps865	1	2nd	i	3	0	1	1	2	1	1
Ps866	0	2nd	i	1	0	0	0	1	0	0
Ps867	0	2nd	i	1	0	0	0	0	0	0
Ps868	0	2nd	i	0	0	0	0	1	0	0
Ps869	0	2nd	i	0	0	0	0	0	0	0
Ps870	1	2nd	i	3	0	0	1	1	0	2
Ps871	0	2nd	i	0	0	0	/	0	0	0
Ps872	0	2nd	i	2	0	1	1	1	0	0
Ps873	0	2nd	i	0	0	0	1	1	0	0
Ps874	1	2nd	i	0	0	0	0	2	0	0
Ps875	0	2nd	i	2	0	0	0	0	0	0
Ps876	1	2nd	i	2	2	1	2	3	2	2
Ps877	0	2nd	i	0	0	0	0	0	0	0
Ps878	0	2nd	i	2	0	0	1	1	0	0
Ps879	0	2nd	i	2	0	0	1	0	0	0
Ps880	1	2nd	i	1	0	0	0	1	0	0
Ps881	0	2nd	i	1	0	0	1	0	0	0
Ps882	0	2nd	i	0	0	0	0	1	0	0
Ps883	0	2nd	i	2	0	0	0	0	0	0
Ps884	0	2nd	i	2	0	0	2	0	0	0
Ps885	0	2nd	i	2	0	0	1	0	0	0
Ps886	0	2nd	i	2	0	0	0	1	0	0
Ps887	1	2nd	i	2	2	3	1	2	1	0
Ps888	0	2nd	i	2	0	0	2	1	0	0
Ps889	0	2nd	i	0	0	0	1	/	0	0
Ps890	0	2nd	i	0	0	0	0	1	0	0
Ps891	0	2nd	n	/	2	0	2	/	0	0
Ps892	0	2nd	n	1	0	0	1	0	0	0
Ps893	1	2nd	n	2	0	0	0	2	0	0
Ps894	0	2nd	n	2	0	0	0	1	0	0
Ps895	0	2nd	n	0	0	0	1	2	0	0
Ps896	1	2nd	n	2	0	3	1	3	2	3
Ps897	0	2nd	n	0	0	0	0	0	0	0
Ps898	1	2nd	n	2	2	0	2	2	2	2
Ps899	0	2nd	n	1	0	0	1	2	0	0
Ps900	1	2nd	n	0	0	0	0	0	0	0
Ps901	0	2nd	n	2	0	0	0	1	0	0
Ps902	0	2nd	n	1	0	0	0	0	0	0
Ps903	1	2nd	n	1	0	0	1	1	0	0
Ps904	0	2nd	n	2	0	0	0	0	0	0
Ps905	0	2nd	n	0	0	0	0	1	0	0
Ps906	1	2nd	n	2	2	0	1	2	1	3
Ps907	1	2nd	n	3	2	3	1	3	1	0
Ps908	0	2nd	n	0	0	0	0	0	0	0
Ps909	0	2nd	n	/	0	0	0	1	0	0
Ps910	1	2nd	n	1	0	0	2	2	0	0
Ps911	0	2nd	n	1	0	0	0	1	0	0
Ps912	0	2nd	n	2	0	0	0	0	0	0
Ps913	0	2nd	n	1	0	0	2	2	0	0
Ps914	1	2nd	n	1	0	0	1	1	0	0
Ps915	0	2nd	n	0	0	0	0	0	0	0
Ps916	0	2nd	n	0	0	0	0	0	0	0
Ps917	0	2nd	n	2	0	0	0	1	0	0
Ps918	1	2nd	n	2	0	0	0	0	0	0
Ps919	0	2nd	n	2	0	0	1	1	0	0
Ps920	0	2nd	n	2	0	0	2	2	0	1
Ps921	0	2nd	n	1	0	0	0	0	0	0
Ps922	1	2nd	n	1	0	0	0	2	0	0
Ps923	0	2nd	n	3	0	0	2	1	0	0
Ps924	0	2nd	n	1	0	0	0	2	0	0
Ps925	1	2nd	n	3	2	3	2	3	3	3
Ps926	0	2nd	n	0	0	2	0	0	0	0
Ps927	0	2nd	n	2	0	0	2	2	0	0
Ps928	1	2nd	n	0	0	0	0	2	0	0
Ps929	0	2nd	n	1	0	0	0	1	0	0
Ps930	0	2nd	n	0	0	0	0	0	0	0
Ps931	0	2nd	n	0	0	0	0	0	0	0
Ps932	0	2nd	n	2	0	0	0	1	0	0
Ps933	0	2nd	n	0	0	0	0	0	0	0
Ps934	1	2nd	n	0	0	0	0	1	2	0
Ps935	0	2nd	n	0	0	0	0	2	0	0
Ps936	0	2nd	n	1	0	0	1	2	0	0
Ps937	0	2nd	n	2	0	0	0	0	0	0
Ps938	1	2nd	n	0	0	0	0	2	0	0
Ps939	0	2nd	n	3	0	0	0	2	0	0
Ps940	0	2nd	n	0	0	0	/	2	0	/
Ps941	1	2nd	n	3	0	3	1	3	2	3
Ps942	0	2nd	n	2	0	0	2	2	0	0
Ps943	1	2nd	n	0	0	0	0	2	0	0
Ps944	0	2nd	n	2	0	0	0	0	0	0
Ps945	0	2nd	n	1	0	0	0	2	0	0
Ps946	0	2nd	n	1	0	0	0	2	0	0
Ps947	1	2nd	n	3	2	3	1	3	2	3
Ps948	0	2nd	n	0	0	0	1	1	0	0
Ps949	0	2nd	n	0	0	0	1	0	0	0
Ps950	0	2nd	n	1	0	0	1	2	0	0

## Sheet: BGCs and accessory genome
Strains and Phenotypes							Natural product BGCs
Strain	Irrigation	Motility	S. scabies inhibition	Take-all inhibition	P. infestans inhibition	Protease activity	CLP	LLP	Safracin	mgo/pvf operon	NRPS 1	NRPS 2	NRPS 3	NRPS 4	NRPS 5	NRPS 6	NRPS 7	NRPS 8	NRPS 9	NRPS 10	NRPS-PKS	Aryl polyene	PKS 1	PKS 2	PKS 3	Pyoverdine	Achromobactin	Pseudomonine	Ornicorrugatin-like	Pyochelin-like 1	Pyochelin-like 2	Pyochelin-like 3	Quinolobactin	Putative siderophore 1	Putative siderophore 2	Microcin B17-like	Lanthipeptide	YcaO cluster	Pep1	Pep2	Pep3	Pep4	Pep5	Carotenoid	Unknown Terpene 1	Unknown Terpene 2	HCN	DMS	Tabtoxin-like
619	N/A	2	3	3	2	0	2	0	0	2	0	0	0	0	0	0	0	0	0	0	0	2	0	0	0	2	0	0	0	0	0	0	0	2	0	0	0	0	2	0	0	0	0	0	0	0	2	0	0
623	N/A	1	0	2	1	0	2	0	0	0	0	0	0	0	0	0	0	0	0	0	0	2	0	0	0	2	0	0	0	0	0	0	0	0	0	0	0	0	0	0	2	0	0	2	0	0	0	0	0
624	N/A	2	3	2	0	0	2	0	0	0	0	0	0	0	0	0	0	0	0	0	0	2	0	0	0	2	0	0	0	0	0	0	0	2	0	0	0	0	2	2	0	0	0	0	0	0	2	0	2
627	N/A	0	0	2	1	0	0	2	0	2	2	0	0	0	0	0	0	0	0	0	0	0	0	0	0	2	0	0	0	0	0	0	0	0	0	0	0	0	0	0	0	0	0	2	0	0	0	0	0
631	N/A	1	1	1	0	0	2	0	0	0	0	0	0	0	0	0	0	0	0	0	0	2	0	0	0	2	0	0	0	0	0	0	0	0	0	0	0	0	0	0	2	0	0	2	0	0	0	0	0
634	N/A	1	2	2	2	0	0	2	0	2	0	2	0	0	0	0	0	0	0	0	0	2	0	0	0	2	2	0	0	0	0	0	0	0	0	0	0	0	2	0	0	0	0	2	0	0	0	0	0
639	N/A	0	0	0	0	0	0	0	0	2	0	0	0	0	0	0	0	0	0	0	0	2	0	0	0	2	0	0	0	0	0	0	0	0	0	0	0	0	0	0	0	0	0	0	0	0	0	0	0
645	N/A	0	0	0	1	0	0	0	0	0	0	0	2	0	0	0	0	0	0	0	0	2	0	0	0	2	0	0	0	0	0	0	0	0	0	0	0	0	2	0	0	0	0	2	0	0	0	0	0
647	N/A	0	0	1	0	0	0	0	0	2	0	0	0	2	0	0	0	0	0	0	0	2	0	0	0	2	0	0	0	0	0	0	0	0	0	2	0	0	2	0	0	0	0	0	0	0	0	0	0
652	N/A	0	3	1	3	2	0	0	0	2	0	0	0	0	2	0	0	0	0	0	0	2	0	0	0	2	0	0	0	0	0	0	0	0	0	0	0	0	0	0	0	0	0	0	0	0	2	2	0
655	N/A	0	3	2	3	0	2	0	0	2	0	0	0	0	0	0	0	0	0	0	0	2	0	0	0	2	0	0	0	0	0	0	0	0	0	0	0	0	2	2	0	0	0	0	2	0	2	0	2
659	N/A	0	0	2	0	0	0	0	0	0	0	0	0	0	0	0	0	0	0	0	0	2	0	0	0	2	0	0	0	0	0	0	0	0	0	0	0	0	0	0	0	0	0	0	0	0	0	0	0
662	N/A	0	2	0	0	0	0	0	0	0	0	0	0	0	0	2	0	0	0	0	0	2	0	0	0	2	0	0	0	0	0	0	0	0	0	0	0	0	0	0	0	0	0	0	0	0	0	0	0
663	N/A	2	2	2	2	2	2	0	0	2	0	0	0	0	0	0	0	0	0	0	0	2	0	0	0	2	0	0	0	0	2	0	0	0	0	0	0	0	2	2	0	2	0	0	0	0	0	0	0
664	N/A	2	2	2	2	0	2	0	0	2	0	0	0	0	0	0	0	2	0	0	0	2	2	0	0	2	0	0	0	0	0	0	0	0	0	2	0	0	2	2	0	0	0	0	0	0	0	0	0
673	N/A	0	0	0	2	0	0	0	0	2	0	0	0	2	0	0	0	0	0	0	0	2	0	0	0	2	0	0	0	0	0	0	0	0	0	0	0	0	0	0	0	0	2	0	0	0	0	0	0
676	N/A	0	0	0	0	0	0	0	0	2	0	0	0	0	0	2	0	0	0	0	0	2	0	0	0	2	0	0	0	0	0	0	0	0	0	0	0	0	0	0	0	0	0	0	0	0	0	0	0
681	N/A	0	1	2	3	0	2	0	0	2	0	0	0	0	0	0	0	0	0	0	0	2	0	0	0	2	0	0	0	0	0	0	0	2	0	0	0	0	2	0	0	0	0	0	0	0	2	0	0
682	N/A	1	2	1	1	2	2	0	0	2	0	0	0	0	0	0	0	0	0	0	0	2	0	0	0	2	0	0	0	0	0	0	0	0	0	0	0	0	2	2	0	2	0	0	0	0	0	0	0
683	N/A	1	2	1	1	2	2	0	0	2	0	0	0	0	0	0	0	0	0	0	0	2	0	0	0	2	0	0	0	0	0	0	0	0	0	0	0	0	2	2	0	2	0	0	0	0	0	0	0
684	N/A	0	1	1	3	0	2	0	0	2	0	0	0	0	0	0	0	0	0	0	0	2	0	0	0	2	0	0	0	0	0	0	0	2	0	0	0	0	2	0	0	0	0	0	0	0	2	0	0
685	N/A	0	0	1	0	0	0	0	0	0	0	0	0	0	0	0	0	0	0	0	0	2	0	0	0	0	0	0	0	0	0	0	0	0	2	0	0	0	2	0	0	0	0	0	0	0	2	2	0
687	N/A	2	3	2	2	2	2	0	0	2	0	0	0	0	0	0	2	2	0	0	0	2	2	0	0	2	0	0	0	0	0	0	0	0	0	2	0	0	2	2	0	0	0	0	0	0	0	0	0
689	N/A	0	2	2	2	0	0	2	0	2	0	2	0	0	0	0	0	0	0	0	0	2	0	0	0	2	2	0	0	0	0	0	0	0	0	0	0	0	0	0	0	0	0	2	0	0	0	0	0
691	N/A	0	0	0	0	0	0	0	0	2	0	0	0	2	0	2	0	0	0	0	0	2	0	2	0	0	2	0	0	0	0	0	0	0	0	0	0	2	0	0	0	0	0	0	0	0	0	0	0
704	N/A	0	2	0	0	0	0	0	0	2	0	0	0	0	0	2	0	0	0	0	0	2	0	0	0	2	0	0	0	0	0	0	0	0	0	0	0	0	0	0	0	0	0	0	0	0	0	0	0
706	N/A	0	1	3	0	2	0	0	0	2	0	0	0	0	0	0	0	0	0	0	0	2	0	0	0	2	0	0	0	2	0	0	0	0	0	2	0	0	2	2	0	2	0	0	0	2	0	0	0
708	N/A	0	2	1	3	2	0	0	0	2	0	0	0	0	0	0	0	0	0	0	0	2	0	0	0	2	0	0	0	2	0	0	0	0	0	2	0	0	2	2	0	2	0	0	0	2	0	0	0
710	N/A	0	0	0	0	0	0	0	0	0	0	0	0	0	0	0	0	0	0	0	0	2	0	0	0	2	2	0	0	0	0	0	0	0	0	0	0	0	0	0	0	0	0	0	0	0	0	0	0
712	N/A	0	0	1	0	0	0	0	0	2	0	0	0	0	0	0	0	0	0	0	0	2	0	0	0	2	0	0	0	0	0	0	0	0	0	0	2	0	0	0	0	0	0	0	0	0	0	0	0
718	N/A	0	1	2	3	0	0	0	0	2	0	0	0	0	0	0	0	0	0	0	0	2	0	0	0	2	0	0	0	0	0	0	0	0	0	0	0	0	2	2	0	0	0	0	0	0	2	0	0
720	N/A	0	2	2	0	2	2	0	0	2	0	0	0	0	0	0	0	0	0	0	0	2	0	0	0	2	0	0	2	2	0	0	0	0	0	0	0	0	2	2	0	0	0	0	0	0	0	0	0
723	N/A	0	0	0	1	0	0	0	0	0	0	0	0	2	0	0	0	0	0	0	0	2	0	0	0	2	2	0	0	0	0	0	0	0	0	0	0	0	0	0	0	0	0	0	0	0	0	0	0
726	N/A	0	2	0	0	0	0	0	0	2	0	0	0	2	0	0	0	0	0	0	0	2	0	0	0	2	0	0	0	0	0	0	0	0	0	0	0	0	2	0	0	0	0	0	0	0	0	0	0
732	N/A	0	3	0	1	2	0	0	0	2	0	0	0	0	0	0	0	0	0	0	0	2	0	0	0	2	0	0	0	0	0	0	0	0	0	0	0	0	2	2	0	0	0	0	0	0	2	0	0
833	Irrigated	0	0	1	0	0	0	0	0	2	0	0	0	0	0	0	0	0	0	0	0	2	0	0	0	2	2	0	0	0	0	0	0	0	0	0	0	0	0	0	0	0	0	0	0	0	0	0	0
834	Irrigated	0	1	2	2	2	0	0	0	2	0	0	0	0	0	0	0	0	0	0	0	2	0	0	0	2	0	0	0	0	0	2	2	0	0	0	0	0	2	2	0	0	0	0	0	0	0	0	0
838	Irrigated	0	0	2	0	0	0	0	0	2	0	0	0	0	0	0	0	0	0	0	0	2	0	0	2	2	0	0	0	0	0	0	0	0	0	0	0	0	0	0	0	0	0	0	0	0	0	0	0
843	Irrigated	0	0	1	0	0	0	0	0	2	0	0	0	2	0	0	0	0	0	0	2	2	0	0	0	2	0	0	0	0	0	0	0	0	0	2	0	0	2	0	0	0	0	0	0	0	0	0	0
847	Irrigated	1	1	0	0	2	0	0	0	2	0	0	0	0	0	0	0	0	0	0	0	2	0	0	0	2	0	0	0	0	0	0	0	0	0	0	0	0	2	0	0	0	0	0	0	0	2	0	0
850	Irrigated	0	0	0	0	0	0	0	0	2	0	0	0	0	0	0	0	0	0	0	0	2	0	0	0	2	2	0	0	0	0	0	0	0	0	0	0	0	0	0	0	0	0	0	0	0	0	0	0
854	Irrigated	0	0	2	0	0	0	0	0	2	0	0	0	0	0	0	0	0	0	0	0	2	0	0	0	2	0	0	0	0	0	0	0	0	0	2	0	0	0	0	0	0	0	0	0	0	0	0	0
858	Irrigated	0	0	1	0	0	0	0	0	2	0	0	0	0	0	2	0	0	0	0	0	2	0	0	0	2	0	0	0	0	0	0	0	0	0	0	0	0	0	0	0	0	0	0	0	0	0	0	0
861	Irrigated	2	1	0	0	0	0	0	0	2	0	0	0	2	0	0	0	0	0	0	0	2	0	0	0	2	0	0	0	0	0	0	0	0	0	0	0	0	0	0	0	0	0	0	0	0	0	0	0
862	Irrigated	0	0	0	0	0	0	0	0	2	0	0	0	0	0	0	0	0	0	0	0	2	0	0	0	2	0	0	0	0	0	0	0	0	0	0	0	0	0	0	0	0	0	0	0	0	0	0	0
865	Irrigated	1	1	2	1	0	0	0	0	2	0	0	0	0	0	0	0	0	0	0	0	2	0	0	0	2	0	0	0	0	0	0	0	0	0	0	0	0	2	0	0	0	0	0	0	0	2	0	0
870	Irrigated	0	0	1	0	0	0	0	0	2	0	0	0	0	0	0	0	0	2	0	0	2	0	0	0	2	0	0	0	0	0	0	0	0	0	0	0	0	2	0	0	0	0	0	0	0	2	0	0
874	Irrigated	0	0	2	0	0	0	0	0	2	0	0	0	0	0	0	0	0	0	0	0	2	0	0	0	2	2	0	0	0	0	0	0	0	0	0	0	0	0	0	0	0	0	0	0	0	0	0	0
876	Irrigated	1	2	3	3	2	0	0	0	2	0	0	0	0	0	0	0	0	0	0	0	2	0	0	2	2	0	0	0	0	0	0	0	0	0	0	0	0	2	2	0	0	0	0	0	0	2	0	0
880	Irrigated	0	0	1	1	0	0	0	0	2	0	0	0	0	0	0	0	0	0	0	0	2	0	0	0	2	0	0	0	0	0	0	0	0	0	0	0	0	2	2	0	0	0	0	0	0	0	0	0
887	Irrigated	3	1	2	2	2	0	0	0	2	0	0	0	0	0	0	0	0	2	0	0	2	0	0	0	2	0	2	0	0	0	0	0	0	0	0	0	0	2	2	0	0	0	0	0	0	0	0	0
893	Not irr	0	0	2	0	0	0	0	0	2	0	0	0	2	0	0	0	0	0	0	0	2	0	0	0	2	0	0	0	0	0	0	0	0	0	0	0	0	0	0	0	0	0	0	0	0	0	0	0
896	Not irr	3	2	3	3	0	2	0	0	2	0	0	0	0	0	0	0	0	0	0	0	2	0	0	0	2	0	0	0	0	0	0	0	0	0	0	0	0	2	0	0	0	0	0	0	0	2	0	0
898	Not irr	0	2	2	2	2	0	0	0	2	0	0	0	0	0	0	0	0	0	0	0	2	0	0	0	2	0	0	0	0	0	0	0	0	0	0	0	0	2	2	0	0	0	0	0	0	2	0	0
900	Not irr	0	0	0	0	0	0	0	0	2	0	0	0	2	0	0	0	0	0	0	0	2	0	0	0	2	0	0	0	0	0	0	0	0	0	0	0	2	0	0	0	0	0	0	0	0	0	0	0
903	Not irr	0	0	1	0	0	0	0	2	2	0	0	0	0	0	0	0	0	0	0	0	2	0	0	2	2	0	0	0	0	0	0	0	0	0	0	0	0	0	0	0	0	0	0	0	0	0	0	0
906	Not irr	0	1	2	2	2	0	0	0	2	0	0	0	0	0	0	0	0	0	0	0	2	0	0	0	2	0	0	0	0	0	0	0	0	0	0	0	0	2	2	0	0	0	0	0	0	2	0	0
907	Not irr	3	1	3	0	2	2	0	0	2	0	0	0	0	0	0	0	0	0	0	0	2	0	0	0	2	0	0	0	0	0	0	0	0	0	0	0	0	2	2	0	2	0	0	0	0	0	0	0
910	Not irr	0	0	2	1	0	0	2	0	2	2	0	0	0	0	0	0	0	0	0	0	0	0	0	0	2	0	0	0	0	0	0	0	0	0	0	0	0	0	0	0	0	0	2	0	0	0	0	0
914	Not irr	0	0	1	2	0	0	0	0	2	0	0	0	0	0	0	0	0	0	0	0	2	0	0	0	2	2	0	0	0	0	0	0	0	0	0	0	0	0	0	0	0	0	0	0	0	0	0	0
918	Not irr	0	0	0	1	0	0	0	0	0	0	0	0	0	0	0	0	0	0	0	0	2	0	0	0	2	0	0	0	0	0	0	0	0	0	0	2	0	0	0	0	0	0	0	0	0	0	0	0
922	Not irr	0	0	2	0	0	0	0	0	2	0	0	0	2	0	0	0	0	0	0	0	2	0	0	0	2	0	0	0	0	0	0	0	0	0	2	0	0	0	0	0	0	0	0	0	0	0	0	0
925	Not Irr	3	3	3	3	2	2	0	0	2	0	0	0	0	0	0	0	0	0	0	0	2	0	0	0	2	0	0	0	0	0	0	0	0	0	0	0	0	2	0	0	0	0	0	0	0	2	0	0
928	Not irr	0	0	2	0	0	0	0	0	2	0	0	0	0	0	0	0	0	0	2	0	2	0	0	0	2	2	0	0	0	0	0	0	0	0	0	0	0	0	0	0	0	0	0	0	0	0	0	0
934	Not irr	0	2	1	0	0	0	0	0	2	0	0	0	2	0	0	0	0	0	0	0	2	0	0	0	2	0	0	0	0	0	0	0	0	0	0	0	0	2	0	0	0	0	0	0	0	0	0	0
938	Not irr	0	0	2	0	0	0	0	0	2	0	0	0	0	0	0	0	0	0	0	0	2	0	0	0	2	0	0	0	0	0	0	0	0	0	0	0	0	0	0	0	0	0	0	0	0	0	0	0
941	Not irr	3	2	3	3	0	2	0	0	2	0	0	0	0	0	0	0	0	0	0	0	2	0	0	0	2	0	0	0	0	0	0	0	0	0	0	0	0	2	0	0	0	0	0	0	0	2	0	0
943	Not irr	0	0	2	0	0	0	0	0	2	0	0	0	0	0	0	0	0	0	0	0	2	0	0	0	2	0	0	0	0	0	0	0	2	0	0	0	0	0	0	0	0	0	0	0	0	0	1	0
947	Not irr	3	2	3	3	2	2	0	0	2	0	0	0	0	0	0	0	0	0	0	0	2	0	0	0	2	0	0	0	0	0	0	0	0	0	0	0	0	2	2	0	0	0	0	0	0	2	0	2
[truncated: 49 more columns]

## Sheet: Later samples
Strains and Sampling			Phenotypes
Strain Identifier	Sample Type	Irrigated or Non-Irrigated	Motility	HCN Production	S. scabies inhibition
IR1-1	Roots	Irrigated	0	0	0
IR1-2	Roots	Irrigated	0	0	0
IR1-3	Roots	Irrigated	0	0	0
IR1-4	Roots	Irrigated	1	1	1
IR1-5	Roots	Irrigated	0	0	0
IR1-6	Roots	Irrigated	0	0	0
IR1-7	Roots	Irrigated	0	0	0
IR1-8	Roots	Irrigated	1	2	2
IR2-1	Roots	Irrigated	0	1	1
IR2-2	Roots	Irrigated	3	2	1
IR2-3	Roots	Irrigated	2	0	1
IR2-4	Roots	Irrigated	3	2	2
IR2-5	Roots	Irrigated	3	2	2
IR2-6	Roots	Irrigated	1	1	2
IR2-7	Roots	Irrigated	0	0	0
IR2-8	Roots	Irrigated	2	0	1
IR3-1	Roots	Irrigated	0	1	2
IR3-2	Roots	Irrigated	1	1	1
IR3-3	Roots	Irrigated	0	0	0
IR3-4	Roots	Irrigated	1	0	0
IR3-5	Roots	Irrigated	1	0	0
IR3-6	Roots	Irrigated	1	1	2
IR3-7	Roots	Irrigated	2	0	0
IR3-8	Roots	Irrigated	1	2	2
IR4-1	Roots	Irrigated	0	0	0
IR4-2	Roots	Irrigated	0	2	2
IR4-3	Roots	Irrigated	1	1	2
IR4-4	Roots	Irrigated	2	1	2
IR4-5	Roots	Irrigated	0	2	2
IR4-6	Roots	Irrigated	1	1	1
IR4-7	Roots	Irrigated	0	0	0
IR4-8	Roots	Irrigated	1	0	1
IR5-1	Roots	Irrigated	0	2	1
IR5-2	Roots	Irrigated	0	0	0
IR5-3	Roots	Irrigated	1	1	0
IR5-4	Roots	Irrigated	3	2	3
IR5-5	Roots	Irrigated	2	2	1
IR5-6	Roots	Irrigated	0	0	0
IR5-7	Roots	Irrigated	1	0	0
IR5-8	Roots	Irrigated	0	0	0
IR6-1	Roots	Irrigated	0	1	2
IR6-2	Roots	Irrigated	0	0	0
IR6-3	Roots	Irrigated	0	0	0
IR6-4	Roots	Irrigated	1	1	1
IR6-5	Roots	Irrigated	1	0	0
IR6-6	Roots	Irrigated	1	0	0
IR6-7	Roots	Irrigated	1	0	0
IR6-8	Roots	Irrigated	3	2	2
IS1-1	Soil	Irrigated	2	2	2
IS1-2	Soil	Irrigated	0	0	0
IS1-3	Soil	Irrigated	0	0	0
IS1-4	Soil	Irrigated	1	1	1
IS1-5	Soil	Irrigated	3	2	2
IS1-6	Soil	Irrigated	2	2	2
IS1-7	Soil	Irrigated	2	0	0
IS1-8	Soil	Irrigated	0	0	0
IS2-1	Soil	Irrigated	0	0	0
IS2-2	Soil	Irrigated	2	1	1
IS2-3	Soil	Irrigated	0	0	0
IS2-4	Soil	Irrigated	0	0	0
IS2-5	Soil	Irrigated	2	0	1
IS2-6	Soil	Irrigated	2	0	0
IS2-7	Soil	Irrigated	1	0	0
IS2-8	Soil	Irrigated	2	2	2
IS3-1	Soil	Irrigated	2	1	1
IS3-2	Soil	Irrigated	2	1	2
IS3-3	Soil	Irrigated	2	0	1
IS3-4	Soil	Irrigated	0	0	0
IS3-5	Soil	Irrigated	2	1	2
IS3-6	Soil	Irrigated	0	0	0
IS3-7	Soil	Irrigated	0	1	2
IS3-8	Soil	Irrigated	0	0	0
IS4-1	Soil	Irrigated	0	0	0
IS4-2	Soil	Irrigated	0	0	0
IS4-3	Soil	Irrigated	0	0	0
IS4-4	Soil	Irrigated	0	0	0
IS4-5	Soil	Irrigated	0	0	0
IS4-6	Soil	Irrigated	0	0	0
IS4-7	Soil	Irrigated	0	0	0
IS4-8	Soil	Irrigated	0	0	0
IS5-1	Soil	Irrigated	0	0	0
IS5-2	Soil	Irrigated	0	0	0
IS5-3	Soil	Irrigated	0	0	0
IS5-4	Soil	Irrigated	0	0	0
IS5-5	Soil	Irrigated	0	0	0
IS5-6	Soil	Irrigated	0	0	0
IS5-7	Soil	Irrigated	0	0	0
IS5-8	Soil	Irrigated	0	0	0
IS6-1	Soil	Irrigated	0	0	0
IS6-2	Soil	Irrigated	0	0	0
IS6-3	Soil	Irrigated	0	0	0
IS6-4	Soil	Irrigated	2	0	0
IS6-5	Soil	Irrigated	2	0	1
IS6-6	Soil	Irrigated	2	0	1
IS6-7	Soil	Irrigated	2	0	1
IS6-8	Soil	Irrigated	0	0	0
NR1-1	Roots	Non-Irrigated	2	0	1
NR1-2	Roots	Non-Irrigated	2	1	1
NR1-3	Roots	Non-Irrigated	2	0	1
NR1-4	Roots	Non-Irrigated	2	2	1
NR1-5	Roots	Non-Irrigated	2	2	2
NR1-6	Roots	Non-Irrigated	2	2	2
NR1-7	Roots	Non-Irrigated	0	1	2
NR1-8	Roots	Non-Irrigated	2	0	1
NR2-1	Roots	Non-Irrigated	2	1	1
NR2-2	Roots	Non-Irrigated	3	1	2
NR2-3	Roots	Non-Irrigated	0	2	0
NR2-4	Roots	Non-Irrigated	3	2	3
NR2-5	Roots	Non-Irrigated	2	1	1
NR2-6	Roots	Non-Irrigated	2	2	2
NR2-7	Roots	Non-Irrigated	2	1	1
NR2-8	Roots	Non-Irrigated	1	0	0
NR3-1	Roots	Non-Irrigated	3	1	2
NR3-2	Roots	Non-Irrigated	0	2	0
NR3-3	Roots	Non-Irrigated	2	1	2
NR3-4	Roots	Non-Irrigated	1	1	1
NR3-5	Roots	Non-Irrigated	3	1	2
NR3-6	Roots	Non-Irrigated	0	0	0
NR3-7	Roots	Non-Irrigated	2	0	2
NR3-8	Roots	Non-Irrigated	2	2	2
NR4-1	Roots	Non-Irrigated	2	2	2
NR4-2	Roots	Non-Irrigated	1	2	1
NR4-3	Roots	Non-Irrigated	0	0	0
NR4-4	Roots	Non-Irrigated	2	1	2
NR4-5	Roots	Non-Irrigated	2	1	2
NR4-6	Roots	Non-Irrigated	0	0	2
NR4-7	Roots	Non-Irrigated	3	2	2
NR4-8	Roots	Non-Irrigated	1	1	1
NR5-1	Roots	Non-Irrigated	3	0	1
NR5-2	Roots	Non-Irrigated	1	2	1
NR5-3	Roots	Non-Irrigated	0	2	2
NR5-4	Roots	Non-Irrigated	0	1	1
NR5-5	Roots	Non-Irrigated	2	1	1
NR5-6	Roots	Non-Irrigated	1	2	2
NR5-7	Roots	Non-Irrigated	2	2	1
NR5-8	Roots	Non-Irrigated	0	2	1
NR6-1	Roots	Non-Irrigated	0	0	0
NR6-2	Roots	Non-Irrigated	1	2	0
NR6-3	Roots	Non-Irrigated	2	1	2
NR6-4	Roots	Non-Irrigated	1	2	1
NR6-5	Roots	Non-Irrigated	3	1	2
NR6-6	Roots	Non-Irrigated	3	2	3
NR6-7	Roots	Non-Irrigated	0	2	3
NR6-8	Roots	Non-Irrigated	0	2	2
NS1-1	Soil	Non-Irrigated	1	2	0
NS1-2	Soil	Non-Irrigated	0	0	0
NS1-3	Soil	Non-Irrigated	0	0	0
NS1-4	Soil	Non-Irrigated	1	1	1
NS1-5	Soil	Non-Irrigated	1	2	1
NS1-6	Soil	Non-Irrigated	0	0	0
NS1-7	Soil	Non-Irrigated	1	1	2
NS1-8	Soil	Non-Irrigated	0	0	0
NS2-1	Soil	Non-Irrigated	0	1	1
NS2-2	Soil	Non-Irrigated	1	0	1
NS2-3	Soil	Non-Irrigated	0	0	0
NS2-4	Soil	Non-Irrigated	0	0	0
NS2-5	Soil	Non-Irrigated	0	0	0
NS2-6	Soil	Non-Irrigated	0	0	0
NS2-7	Soil	Non-Irrigated	1	0	1
NS2-8	Soil	Non-Irrigated	0	0	0
NS3-1	Soil	Non-Irrigated	1	1	1
NS3-2	Soil	Non-Irrigated	0	0	0
NS3-3	Soil	Non-Irrigated	0	0	0
NS3-4	Soil	Non-Irrigated	0	0	0
NS3-5	Soil	Non-Irrigated	0	0	0
NS3-6	Soil	Non-Irrigated	0	0	0
NS3-7	Soil	Non-Irrigated	2	0	1
NS3-8	Soil	Non-Irrigated	0	0	0
NS4-1	Soil	Non-Irrigated	0	0	0
NS4-2	Soil	Non-Irrigated	0	1	2
NS4-3	Soil	Non-Irrigated	0	0	0
NS4-4	Soil	Non-Irrigated	0	2	2
NS4-5	Soil	Non-Irrigated	0	0	0
NS4-6	Soil	Non-Irrigated	0	2	2
NS4-7	Soil	Non-Irrigated	0	0	0
NS4-8	Soil	Non-Irrigated	0	1	2
NS5-1	Soil	Non-Irrigated	0	2	2
NS5-2	Soil	Non-Irrigated	0	0	0
NS5-3	Soil	Non-Irrigated	0	0	0
NS5-4	Soil	Non-Irrigated	0	1	1
NS5-5	Soil	Non-Irrigated	0	2	2
NS5-6	Soil	Non-Irrigated	0	0	0
NS5-7	Soil	Non-Irrigated	0	0	0
NS5-8	Soil	Non-Irrigated	1	2	1
NS6-1	Soil	Non-Irrigated	0	0	0
NS6-2	Soil	Non-Irrigated	0	0	0
NS6-3	Soil	Non-Irrigated	0	0	0
NS6-4	Soil	Non-Irrigated	0	0	0
NS6-5	Soil	Non-Irrigated	0	2	2
NS6-6	Soil	Non-Irrigated	0	0	0
NS6-7	Soil	Non-Irrigated	0	0	0
NS6-8	Soil	Non-Irrigated	0	2	1
